# Supplementary material for: The Use of Massive Sequencing to Detect Differences between Immature Embryos of MON810 and a Comparable Non-GM Maize Variety
Source: PLoS One. 2014 Jun 26;9(6):e100895. doi: 10.1371/journal.pone.0100895 (PMC4072715; doi:10.1371/journal.pone.0100895)
Supplement: Table S4 — Genes showing differential expression in DKC6575 and Tietar 20 DAP embryos, as assessed by microarray hybridization (labeled in blue are genes up-regulated in MON810 embryos; labeled in red are those down-regulated in MON810 embryos). (XLSX) [file pone.0100895.s009.xlsx]

## Sheet: full_table_
Table S4. Genes showing differential expression in DKC6575 and Tietar 20 DAP embryos, as assessed by microarray hybridization (labeled in blue are genes up-regulated in MON810 embryos; labeled in red are those down-regulated in MON810 embryos).
ProbeName	Agilent Systematic Name	Maize Gene Identifier	log2 Fold-Change	p-value	adj p-value FDR 10%	Accession	Database	Description (specie)
A_92_P035715	TC300539	GRMZM2G181607	2.86181	0.000250154	3.24982e-05	Q6Z4N3	UniProtKB	Thiorredoxin putative (O.sativa)
A_92_P003220	TC281544	GRMZM2G158489	2.36282	0.000338869	3.49859e-05	Q6Z4F3	UniProtKB	WD domain, G-beta repeat domain containing protein (O.sativa)
A_92_P025855	BG836828	GRMZM2G031501	2.07534	0.00164158	5.15772e-05	B4FQ38	UniProtKB	Uncharacterized protein (Z.mays)
A_92_P039052	TC305863	GRMZM2G353548	1.82358	0.000164401	5.16045e-09	Q6K884	UniProtKB	Transducin-like (O.sativa)
A_92_P041403	TC302294	GRMZM2G013811	1.7505	5.41827e-06	3.8528e-05	C0HGR4	UniProtKB	4-alpha-glucanotransferase putative (Z.mays)
A_92_P012258	TC298467	GRMZM2G153227	1.74375	5.54104e-05	8.18832e-06	B6SN85	UniProtKB	H/ACA ribonucleoprotein complex subunit 3-like protein (Z.mays)
A_92_P005988	TC297888	GRMZM2G164352	1.7409	7.23803e-05	9.02745e-07	Q32SG2	UniProtKB	Protein phosphatase 2A regulatory subunit A (Z.mays)
A_92_P026125	TC302719	GRMZM2G107116	1.73952	5.47133e-05	3.85384e-09	Q5Z876	UniProtKB	Proteasome activator subunit 4 like (Z.mays)
A_92_P023257	TC290240	GRMZM2G477205	1.72664	0.00345374	6.77317e-08	C0P5V4	UniProtKB	E3-Ubiquitin ligase related (A.thaliana)
A_92_P019124	TC296379	GRMZM2G142870	1.71308	4.71998e-05	7.67782e-08	K7UWA2	UniProtKB	Uncharacterized protein (Z.mays)
A_92_P002199	CF016504	GRMZM2G065908	1.70573	0.000672639	4.04802e-07	B4FEM1	UniProtKB	Uncharacterized protein (Z.mays)
A_92_P011507	TC312014	GRMZM2G177599	1.69316	2.06454e-05	5.56991e-08	B6SQD4	UniProtKB	Catalytic/ oxidoreductase protein (Z.mays)
A_92_P008886	TC298530	GRMZM2G031360	1.59775	6.70789e-05	8.78178e-09	Q7XI39	UniProtKB	Putative clathrin-adaptor medium chain apm 4 (Z.mays)
A_92_P032025	AI901579	GRMZM2G015610	1.55209	3.65608e-06	6.91045e-07	C0PDY9	UniProtKB	Uncharacterized protein (Z.mays)
A_92_P007454	TC294707	GRMZM2G040095	1.54897	1.12324e-09	4.60882e-07	A1XCI1	UniProtKB	Lipoxygenase (Z.mays)
A_92_P025551	CF003329	GRMZM2G008232	1.54262	0.000324812	3.45954e-06	B6TEL5	UniProtKB	V-type proton ATPase subunit F (Z.mays)
A_92_P041781	DR799242	GRMZM2G132704	1.5372	1.04259e-05	4.52763e-08	Q6Z3T4	UniProtKB	Uncharacterized protein (Z.mays)
A_92_P027734	CA398577	GRMZM5G886109	1.52395	2.18585e-05	3.22144e-09	K7V4B8	UniProtKB	Uncharacterized protein (Z.mays)
A_92_P037994	BE051537	GRMZM5G826911	1.51297	0.000166677	5.18611e-07	B4FAM7	UniProtKB	Uncharacterized protein (Z.mays)
A_92_P014758	TC292208	GRMZM2G151826	1.50741	0.00681935	4.05942e-09	B4G237	UniProtKB	Histone H2A (Z.mays)
A_92_P009983	TC313045	GRMZM2G312838	1.38126	6.25188e-05	8.56027e-07	B4FMN8	UniProtKB	GTPase activating protein (Z.mays)
A_92_P002582	TC285925	GRMZM2G082484	1.35151	0.000108996	4.58569e-09	C0HHR4	UniProtKB	Uncharacterized protein (Z.mays)
A_92_P023576	DT945688	GRMZM2G172369	1.30962	0.000843819	4.30488e-07	B8A1C7	UniProtKB	Mannose binding-protein uncharacterized (Z.mays)
A_92_P002760	TC300494	GRMZM2G359038	1.30647	0.0247192	5.98389e-10	Q6H8E4	UniProtKB	Nucleotide transporter 1, putative (O.sativa)
A_92_P013455	TC280596	GRMZM2G122481	1.30242	0.000250003	6.00074e-05	B4FFJ1	UniProtKB	Cytochrome C oxidase (Z.mays)
A_92_P022727	TC292462	GRMZM2G037698	1.29524	3.51231e-05	6.81512e-08	B6TRQ7	UniProtKB	Pre-mRNA-splicing factor 19 (Z.mays)
A_92_P021920	TC300025	GRMZM2G316362	1.27348	1.88027e-06	5.40458e-08	B6UI69	UniProtKB	Acyl-desaturase (Z.mays)
A_92_P002513	TC290999	GRMZM2G043117	1.23445	3.22706e-05	6.59508e-05	B6U2A5	UniProtKB	Plant-specific domain TIGR01570 family protein (Z.mays)
A_92_P040315	TC285928	GRMZM5G866100	1.21579	2.80146e-05	6.24506e-09	B6T7J2	UniProtKB	Uridine Kinase (Z.mays)
A_92_P005666	TC307164	GRMZM2G075431	1.2123	0.000245716	5.973e-06	A3BN26	UniProtKB	RNA pseudouridine synthase, putative (Z.mays)
A_92_P023767	TC280287	GRMZM2G109405	1.18224	9.82728e-06	4.46869e-11	B6TXQ1	UniProtKB	Phosphatase DCR2 (Z.mays)
A_92_P010805	BE049914	GRMZM2G015605	1.18106	6.61475e-06	4.02287e-13	C0HIJ6	UniProtKB	NaCl stress protein1 (Z.mays)
A_92_P014223	DR799595	GRMZM2G084944	1.17897	3.81971e-05	7.05132e-08	C0PFG7	UniProtKB	Uncharacterized protein (Z.mays)
A_92_P039299	CF016985	GRMZM2G415359	1.16111	4.38882e-06	7.46074e-06	Q08062	UniProtKB	Malate dehydrogenase, cytoplasmic (Z.mays)
A_92_P040416	DR819775	GRMZM2G165815	1.15023	1.86556e-07	5.39537e-10	B4FU92	UniProtKB	Uncharacterized protein (Z.mays)
A_92_P018124	TC293507	GRMZM2G335287	1.14695	0.00885572	0.000963455	A2XXG5	UniProtKB	ATMIN7, putative (O.sativa)
A_92_P001677	TC311639	GRMZM2G159110	1.12535	5.03495e-06	7.88178e-08	B4FF40	UniProtKB	Uncharacterized protein (Z.mays)
A_92_P037538	TC279569	GRMZM2G025783	1.12397	5.15638e-11	7.94613e-06	B6TRE3	UniProtKB	Protein kinase Kelch repeat:Kelch (Z.mays)
A_92_P036369	TC280399	GRMZM2G334628	1.09782	6.39755e-07	8.64224e-06	B4FHF9	UniProtKB	Uncharacterized protein (Z.mays)
A_92_P020572	TC301682	GRMZM2G342515	1.07726	8.62362e-06	9.56731e-09	P54348	UniProtKB	Histone H2B.5 (Z.mays)
A_92_P006426	TC281286	GRMZM5G802816	1.06645	6.61711e-06	8.74737e-09	C4J019	UniProtKB	Uncharacterized protein (Z.mays)
A_92_P029420	CD977200	GRMZM2G028929	1.06543	7.9147e-05	9.29811e-06	Q9M639	UniProtKB	Epsilon-COP (Z.mays)
A_92_P033563	TC290710	GRMZM2G305362	1.03893	8.04949e-09	9.35741e-11	Q8RWY5	UniProtKB	DNA-binding protein (A.thaliana)
A_92_P011052	TC304501	GRMZM2G096435	1.03056	0.00837706	9.47329e-13	B6UIA7	UniProtKB	Oleosin Bn-V (Z.mays)
A_92_P023860	TC306554	GRMZM2G146697	1.00782	0.00059579	8.41427e-09	C0PHF1	UniProtKB	Uncharacterized protein (Z.mays)
A_92_P026652	TC287377	GRMZM5G803992	1.00758	9.61912e-10	9.89216e-05	B4FJG4	UniProtKB	DNA-directed RNA polymerase II 8.2 kDa polypeptide (Z.mays)
A_92_P000089	TC312105	GRMZM2G089688	1.00464	9.82193e-06	9.9472e-06	B6T0K0	UniProtKB	Uncharacterized protein (Z.mays)
A_92_P006884	TC297893	GRMZM2G061135	1.00041	9.98109e-08	9.99533e-07	B8A068	UniProtKB	S-adenosylmethionine synthase (Z.mays)
A_92_P041816	AI942061	GRMZM2G162333	-1.0001	9.99608e-07	9.99875e-07	B8A0X6	UniProtKB	Pectinesterase (Z.mays)
A_92_P011097	TC292627	GRMZM2G129331	-1.00281	9.89311e-05	9.9709e-07	C0PJC0	UniProtKB	Uncharacterized protein (Z.mays)
A_92_P006418	TC311151	AC196475.3_FG005	-1.00675	9.72582e-06	9.91651e-07	Q6VWG3	UniProtKB	Flavonoid O-methyltransferase (Z.mays)
A_92_P017944	TC281325	GRMZM2G027862	-1.01112	9.71603e-06	9.91462e-08	F4IIM1	UniProtKB	Cellulose synthase-interactive protein 1 (A.thaliana)
A_92_P035642	TC310992	GRMZM2G075683	-1.01698	9.63387e-06	9.89452e-05	Q6K9N1	UniProtKB	Casein-kinase 1 CK1 like (O.sativa)
A_92_P011606	TC286927	GRMZM2G044004	-1.02373	8.69582e-05	9.58787e-05	B6UEB5	UniProtKB	Nucleic acid binding protein (Z.mays)
A_92_P018051	TC311872	GRMZM2G046191	-1.03265	9.22379e-06	9.75868e-06	Q9FQ75	UniProtKB	Putative tryptophan synthase alpha (Z.mays)
A_92_P031219	AW231828	GRMZM2G158568	-1.03348	0.00821422	9.42094e-05	C0P7M8	UniProtKB	Serine/threonine-protein kinase AFC3, putative (Z.mays)
A_92_P029239	TC288195	GRMZM2G086801	-1.0394	4.39053e-05	3.67716e-06	B4FUK9	UniProtKB	COP9 signalosome complex subunit 5b (Z.mays)
A_92_P012955	TC310576	GRMZM2G010637	-1.04326	8.90717e-05	9.64673e-06	K7V8E2	UniProtKB	Uncharacterized protein (Z.mays)
A_92_P031343	TC305209	GRMZM2G052088	-1.04475	1.68327e-05	3.11702e-09	Q0JLN5	UniProtKB	Vacuolar ATP synthase subunit d, putative (O.sativa)
A_92_P014445	CF635824	GRMZM2G036697	-1.05073	7.59334e-05	9.18026e-08	K7VJV2	UniProtKB	Putative RING zinc finger domain superfamily protein (Z.mays)
A_92_P027443	TC305327	GRMZM2G000264	-1.06261	6.79155e-05	8.81756e-06	Q8L6I1	UniProtKB	Plasma membrane ATPase 11, putative (O.sativa)
A_92_P019574	TC306832	GRMZM2G094072	-1.06287	7.0025e-05	8.92118e-05	K7U423	UniProtKB	CFM2 (Z.mays)
A_92_P011681	TC313771	GRMZM2G167637	-1.0637	7.1892e-06	9.00718e-08	C4J3B1	UniProtKB	Pectinesterase (Z.mays)
A_92_P010000	TC302542	GRMZM2G141665	-1.07139	0.000731232	9.05526e-05	B6SI84	UniProtKB	Syringomycin biosynthesis enzyme (Z.mays)
A_92_P037252	CD443085	GRMZM2G123371	-1.07653	0.00067904	8.81725e-06	C0HH60	UniProtKB	Uncharacterized protein (Z.mays)
A_92_P007854	TC288850	GRMZM2G006790	-1.08127	5.9971e-05	8.43421e-05	B4FGG7	UniProtKB	Calcium ion binding protein (Z.mays)
A_92_P003839	TC304997	GRMZM2G079538	-1.09461	6.08097e-05	8.48074e-06	B6TFG5	UniProtKB	Dihydrolipoyllysine-residue succinyltransferase component of 2-oxoglutarate dehydrogenase complex (Z.mays)
A_92_P040253	TC279509	GRMZM2G147213	-1.0947	6.37653e-05	8.63271e-06	K7VV51	UniProtKB	ATP binding protein (Z.mays)
A_92_P035919	TC292697	GRMZM2G088212	-1.09795	0.000604169	8.45807e-06	P18122	UniProtKB	Catalase isozyme 1 (Z.mays)
A_92_P023728	CD651781	GRMZM2G093855	-1.09924	0.000803153	9.35611e-06	B4FD10	UniProtKB	Uncharacterized protein (Z.mays)
A_92_P041989	TC281807	GRMZM2G071333	-1.09952	0.000677737	8.80927e-06	B8BDA2	UniProtKB	leucyl-tRNA synthetase, cytoplasmic, putative (O.sativa)
A_92_P033252	TC299925	GRMZM2G007195	-1.10519	0.000736911	9.08677e-06	Q60E78	UniProtKB	UDP-glucuronic acid decarboxylase putative (O.sativa)
A_92_P002296	TC283962	GRMZM2G478709	-1.10734	0.000535655	8.07649e-05	K7V111	UniProtKB	Uncharacterized protein (Z.mays)
A_92_P021287	TC302254	GRMZM2G021777	-1.11444	4.98231e-05	7.84664e-05	Q6K9C5	UniProtKB	CCT/B-box zinc finger protein, putative (Z.mays)
A_92_P029126	TC281830	GRMZM2G057448	-1.13222	6.09953e-05	8.48888e-05	B6TUC1	UniProtKB	Histone-arginine methyltransferase CARM1 (Z.mays)
A_92_P020629	AW288675	GRMZM2G375116	-1.14021	0.000407855	7.24147e-05	Q6YWQ4	UniProtKB	potassium transporter, putative (O.sativa)
A_92_P019912	TC281388	GRMZM2G083847	-1.16063	3.29573e-05	6.65495e-05	C0PE82	UniProtKB	Uncharacterized protein (Z.mays)
A_92_P023938	TC281500	GRMZM2G407044	-1.16242	5.78412e-05	8.30796e-05	B6TXK4	UniProtKB	Acetolactate synthase/ amino acid binding protein (Z.mays)
A_92_P021292	TC305505	GRMZM2G137348	-1.16336	4.73305e-05	7.68236e-05	K7VEA5	UniProtKB	Uncharacterized protein (Z.mays)
A_92_P040201	CD949131	GRMZM2G104632	-1.16586	6.34022e-05	8.61152e-05	B6TDF8	UniProtKB	Glyceraldehyde-3-phosphate dehydrogenase, cytosolic (Z.mays)
A_92_P004857	TC280661	GRMZM2G095593	-1.1895	1.6904e-05	3.11702e-05	P46466	UniProtKB	26S protease regulatory subunit 4 homolog (O.sativa)
A_92_P025131	TC311437	GRMZM2G024145	-1.19079	3.27519e-05	6.64001e-05	B4FAN1	UniProtKB	Serine incorporator 3 (Z.mays)
A_92_P000098	TC309306	GRMZM2G026991	-1.1957	3.93184e-07	7.14694e-09	A2WZV9	UniProtKB	Uncharacterized protein (Z.mays)
A_92_P032999	CA402015	GRMZM2G134251	-1.20843	4.09232e-05	7.24986e-08	B4FYZ2	UniProtKB	Beta-hexosaminidase (Z.mays)
A_92_P030466	CN844792	GRMZM2G127117	-1.21938	1.85005e-06	5.37931e-09	B6T478	UniProtKB	Glucan endo-1,3-beta-glucosidase 7 (Z.mays)
A_92_P007989	TC281088	GRMZM2G385989	-1.2205	5.55068e-07	8.19587e-06	C0HGS1	UniProtKB	Vesicle-associated membrane protein-associated protein A (Z.mays)
A_92_P016199	TC292709	GRMZM2G702490	-1.22098	2.73079e-06	6.18787e-06	C0P9G2	UniProtKB	Propionyl-CoA carboxylase beta chain (Z.mays)
A_92_P030089	CD976852	GRMZM2G068586	-1.22136	4.99727e-06	7.85686e-06	B4FG04	UniProtKB	TUB transcription factor (Z.mays)
A_92_P003610	TC310752	GRMZM2G117642	-1.22547	2.70633e-05	6.17148e-07	B4FQQ1	UniProtKB	Uncharacterized protein (Z.mays)
A_92_P012463	TC287789	GRMZM2G028286	-1.22571	6.51973e-07	8.70152e-07	Q84Z01	UniProtKB	Xyloglucan glycosyltransferase 10 (O.sativa)
A_92_P020910	CD434995	GRMZM2G163297	-1.23157	0.000474889	7.69355e-06	B6TQJ9	UniProtKB	ELAV-like protein 4 (Z.mays)
A_92_P005087	TC288107	GRMZM2G326545	-1.24475	4.61561e-07	7.59985e-06	B6T5V1	UniProtKB	Uncharacterized protein (Z.mays)
A_92_P023032	BM500420	GRMZM2G447795	-1.24539	9.0972e-09	4.38404e-07	B6U2X8	UniProtKB	Xylanase inhibitor protein 1 (Z.mays)
A_92_P016146	DT940234	GRMZM2G416388	-1.27541	8.37714e-05	9.47329e-05	B4G1D2	UniProtKB	CBS domain protein (Z.mays)
A_92_P005862	TC298859	GRMZM2G174757	-1.32056	9.19228e-08	4.39648e-08	C0P790	UniProtKB	Eukaryotic translation initiation factor 3 subunit B (Z.mays)
A_92_P016599	TC289375	GRMZM2G130052	-1.32286	8.89161e-07	4.3654e-07	B4FFM1	UniProtKB	Uncharacterized protein (Z.mays)
A_92_P002287	TC293901	GRMZM2G053767	-1.33009	1.48008e-06	4.97616e-08	B4FE03	UniProtKB	40S ribosomal protein S4-like (Z.mays)
A_92_P036877	TC281183	GRMZM2G111143	-1.34139	1.82816e-05	5.35009e-09	Q53MA7	UniProtKB	Glucan endo-1,3-beta-glucosidase (O.sativa)
A_92_P025162	CF014390	GRMZM2G135727	-1.3509	7.60468e-06	9.1841e-07	P35684	UniProtKB	60S ribosomal protein L3 (O.sativa)
A_92_P035501	TC279235	GRMZM2G047055	-1.35509	2.66657e-06	6.14102e-06	B6TQ08	UniProtKB	Actin-1 (Z.mays)
A_92_P014085	TC299520	GRMZM2G134797	-1.36938	1.11746e-06	4.60333e-08	C0HHC4	UniProtKB	Nucleoside diphosphate kinase (Z.mays)
A_92_P024286	BG316625	GRMZM2G412470	-1.38859	5.4568e-07	3.85384e-08	K7UHD4	UniProtKB	MA3 domain containing protein (Z.mays)
A_92_P015689	CF049664	GRMZM2G102891	-1.41308	1.05674e-05	4.54288e-09	Q9SM26	UniProtKB	60S acidic ribosomal protein (Z.mays)
A_92_P038502	TC297938	GRMZM2G040477	-1.42829	2.2692e-06	5.78265e-08	B4FKM1	UniProtKB	Guanine nucleotide-binding protein beta subunit-like protein (Z.mays)
A_92_P025790	DT938055	GRMZM2G140201	-1.43444	1.47539e-06	4.97384e-10	A2ZXS2	UniProtKB	Endo-Beta-Mannanase (O.sativa)
A_92_P009619	TC302195	GRMZM2G074957	-1.46768	8.091e-05	9.37631e-07	Q6Z901	UniProtKB	Kinesin light chain-like protein (Z.mays)
A_92_P015128	TC279797	GRMZM2G310431	-1.47276	9.56739e-08	4.43571e-09	P11143	UniProtKB	Heat shock 70 kDa protein (Z.mays)
A_92_P032098	TC282447	GRMZM2G003028	-1.51336	6.77847e-06	4.05282e-08	Q6K9R2	UniProtKB	Thioredoxin, putative (O.sativa)
A_92_P034673	TC312884	GRMZM2G164759	-1.52692	2.60813e-06	6.09332e-08	K7U239	UniProtKB	Uncharacterized protein (Z.mays)
A_92_P032506	TC280434	GRMZM2G018375	-1.54082	2.98253e-08	3.37713e-09	Q41738	UniProtKB	Thiamine thiazole synthase 1, chloroplastic (Z.mays)
A_92_P022674	TC311652	GRMZM2G160032	-1.54789	5.13027e-05	7.93173e-08	Q8LSJ9	UniProtKB	Transcription factor X1, putative (Z.mays)
A_92_P021568	TC287383	GRMZM2G179981	-1.54813	2.74725e-05	6.20572e-10	Q5QM39	UniProtKB	Putative cinnamyl alcohol dehydrogenase (O.sativa)
A_92_P011510	BG841456	GRMZM2G100120	-1.55439	1.40759e-05	3.09607e-08	B4FL35	UniProtKB	Eukaryotic translation initiation factor 3 subunit K (Z.mays)
A_92_P038103	TC289643	GRMZM2G002178	-1.5967	6.24405e-05	3.96561e-10	B6SUP5	UniProtKB	Cytochrome P450 CYP74A19 (Z.mays)
A_92_P022582	BG549215	GRMZM2G083173	-1.66444	5.85729e-05	3.91372e-09	B6U6U2	UniProtKB	Hexose transporter (Z.mays)
A_92_P016722	CF020634	GRMZM2G165817	-1.75775	0.00739349	3.09607e-08	Q9FXT8	UniProtKB	26S proteasome regulatory ATPase subunit 4 (Z.mays)
A_92_P039875	TC300732	GRMZM2G095657	-1.81217	0.00100198	4.48932e-08	B4FD88	UniProtKB	Uncharacterized protein (Z.mays)
A_92_P025793	BU079860	GRMZM2G010095	-1.82861	2.67876e-05	3.30086e-08	K7TGH2	UniProtKB	Uncharacterized protein (Z.mays)
A_92_P030912	TC295339	GRMZM2G076544	-1.84851	2.59205e-05	3.26446e-10	B6TCE9	UniProtKB	Peptidyl-prolyl cis-trans isomerase (Z.mays)
A_92_P016370	TC293593	GRMZM2G366935	-1.99121	7.79524e-06	4.2284e-11	C0P7M8	UniProtKB	Serine/threonine-protein kinase AFC3, putative (Z.mays)
A_92_P013298	TC310169	GRMZM5G863602	-2.30649	3.52013e-05	3.54467e-06	B6U2S9	UniProtKB	Senescence-associated protein DH (Z.mays)
A_92_P015409	DR814105	GRMZM5G898915	-7.86238	0.000494335	0.00309607	Q33AZ5	UniProtKB	Aldose 1-epimerase, putative (O.sativa)
